# Supplementary material for: Selective Biological Effects of Selenium-Enriched Polysaccharide (Se-Le-30) Isolated from Lentinula edodes Mycelium on Human Immune Cells
Source: MDPI journal article supplement (doi:10.3390/biom11121777), 2021-11-26
Supplement: s1 [file s1]

|                                                                                                                                                                                                         |                                                                               |
|---------------------------------------------------------------------------------------------------------------------------------------------------------------------------------------------------------|-------------------------------------------------------------------------------|
| <b>A.</b> $[\rightarrow 4\text{-}\alpha\text{-D-Glcp}\text{-(1}\rightarrow\text{4)}\text{-}\alpha\text{-D-Glcp}\text{-(1}\rightarrow\text{)}]_n$                                                        | $\alpha(1\rightarrow 4)\text{-glucan}$                                        |
| <b>B.</b> $[\rightarrow 6\text{-}\beta\text{-D-Glcp}\text{-(1}\rightarrow\text{6)}\text{-}\beta\text{-D-Glcp}\text{-(1}\rightarrow\text{)}]_n$                                                          | $\beta(1\rightarrow 6)\text{-glucan}$                                         |
| <b>C.</b> $[\rightarrow 3\text{-}\beta\text{-D-Glcp}\text{-(1}\rightarrow\text{3)}\text{-}\beta\text{-D-Glcp}\text{-(1}\rightarrow\text{)}]_n$                                                          | $\beta(1\rightarrow 3)\text{-glucan}$                                         |
| <b>D.</b> $[\rightarrow 6\text{-}\beta\text{-D-Glcp}\text{-(1}\rightarrow\text{6)}\text{-}\beta\text{-D-Glcp}\text{-(1}\rightarrow\text{6)}\text{-}\beta\text{-D-Glcp}\text{-(1}\rightarrow\text{)}]_n$ | $\beta(1\rightarrow 3)\text{-}\beta(1\rightarrow 6)\text{-glucan}$            |
|                                                                                                                                                                                                         | $\begin{array}{c} 3 \\ \uparrow \\ \beta\text{-D-Glcp} \end{array}$           |
| <b>E.</b> $[\rightarrow 3\text{-}\beta\text{-D-Glcp}\text{-(1}\rightarrow\text{3)}\text{-}\beta\text{-D-Glcp}\text{-(1}\rightarrow\text{3)}\text{-}\beta\text{-D-Glcp}\text{-(1}\rightarrow\text{)}]_n$ | $\beta(1\rightarrow 6)\text{-}\beta(1\rightarrow 3)\text{-glucan (Lentinan)}$ |
|                                                                                                                                                                                                         | $\begin{array}{c} 6 \\ \uparrow \\ \beta\text{-D-Glcp} \end{array}$           |

**Supplementary Figure S1.** The structure of polysaccharides presented in fraction Se-Le-30 versus lentinan: (A)  $\alpha(1\rightarrow 4)$  glucan; (B)  $\beta(1\rightarrow 3)$  glucan; (C)  $\beta(1\rightarrow 6)$  glucan; (D)  $\beta(1\rightarrow 3)\text{-}\beta(1\rightarrow 6)$  glucan, (E).  $\beta(1\rightarrow 6)\text{-}\beta(1\rightarrow 3)$  glucan (lentinan).

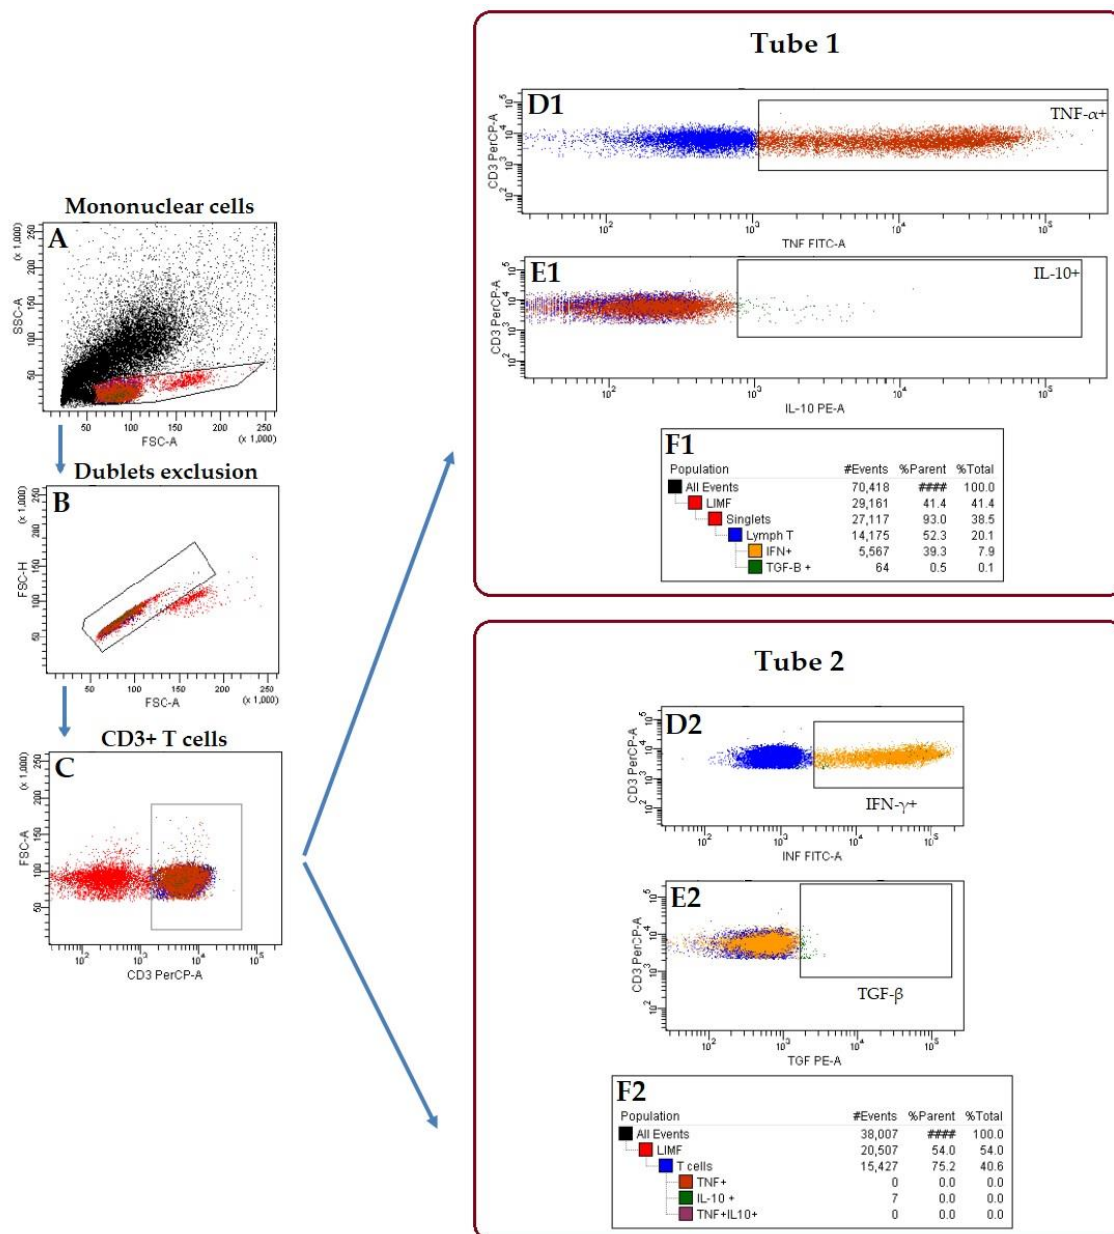

**Supplementary Figure S2.** Gating strategy for flow cytometry intracellular cytokine expression assay. Mononuclear cells were gated on FSC-A/SSC-A plot as cell below  $50 \times 10^3$  on SSC and  $50\text{--}200 \times 10^3$  FSC (A). From previously gated population cell aggregates were excluded (B). Subsequently CD3+ cells were identified by fluorescence above  $10^3$  on PerCP channel (C). An experiment was conducted in two variations of intracellular staining: IFN- $\gamma$  - FITC and TGF- $\beta$  - PE (Tube 1), TNF- $\alpha$  - FITC and IL-10 - PE (Tube 2). Cut-off value for positive fluorescence of studied intracellular cytokines (D1, D2, E1, E2) were based on Fluorescence-Minus-One experiment and corresponding isotype controls. The hierarchy for studies populations and target cells (F1 and F2).
